# Supplementary material
Source: publisher figshare collection journal article supplement (https://karger.figshare.com/ndownloader/files/16356746)
Supplement: Supplementary file 1 [file 16356746]

Supplementary Figure 1 Sensitivity analyses of the association of pretreatment LMR with overall survival (Figure 1a) and progression-free survival (Figure 1b).

Supplementary Figure 2 Begg’s funnel plots of the association of pretreatment LMR with overall survival (Figure 1a) and progression-free survival (Figure 2b).

Supplementary Figure 3 Filled funnel plots of the association of pretreatment LMR with overall survival (Figure 1a) and progression-free survival (Figure 1b).
